# Supplementary material for: 17β-estradiol Enhances 5-Fluorouracil Anti-Cancer Activities in Colon Cancer Cell Lines
Source: MDPI journal article supplement (doi:10.3390/medsci10040062), 2022-10-28
Supplement: s1 [file s1]

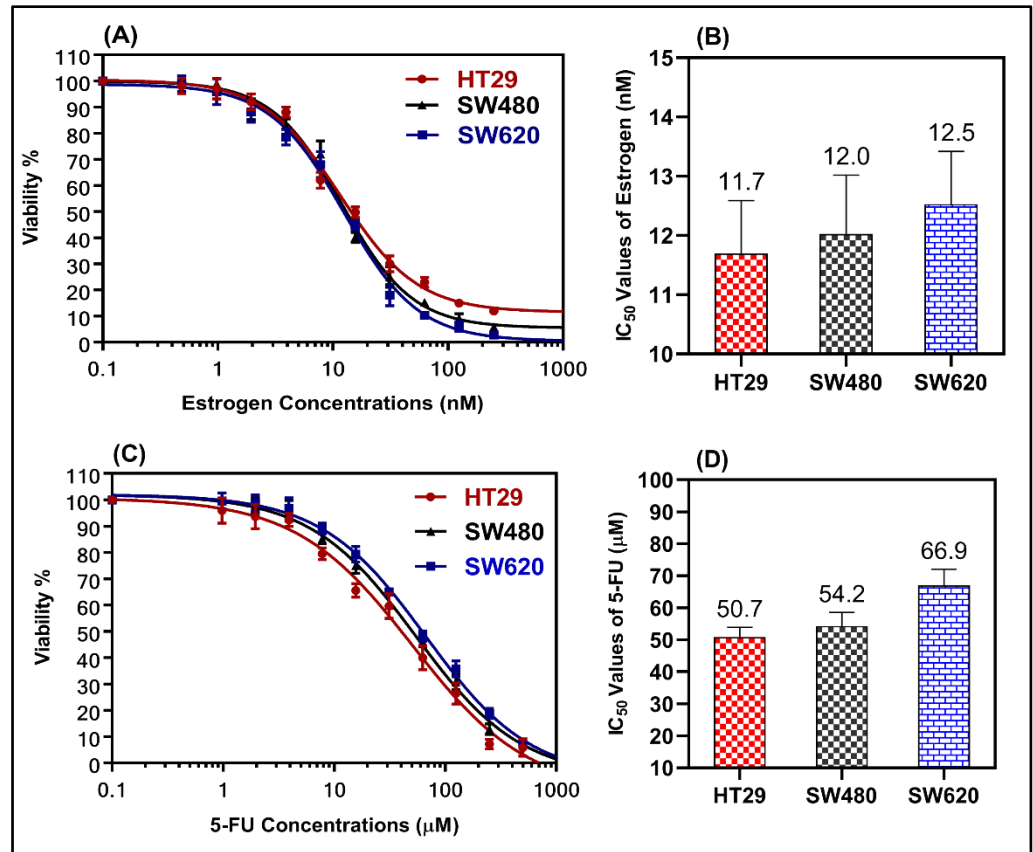

**Figure S1.** Colon cancer cells (HT-29, SW480, and SW620) were treated with a wide range of concentrations of the 7 $\beta$ -estradiol (E2) and 5-Fluorouracil (5-FU) 72 h, and the IC<sub>50</sub> for each demonstrated using the MTT cell viability assay. **(A)** The MTT data showed that all the colon cancer cells have an almost similar dose response in the cell viability inhibition against the investigated concentrations of E2 monotherapy. **(B)** The IC<sub>50</sub> values of the E2 were 11.7  $\mu$ M for the HT-29 cells, 12  $\mu$ M for the SW480 cells, and 12.5  $\mu$ M for the SW620 cells. **(C)** The MTT data showed that all the colon cancer cells have an almost similar dose response in the cell viability inhibition against the investigated concentrations of 5-FU monotherapy. **(D)** The IC<sub>50</sub> values of the 5-FU were 50.7  $\mu$ M for the HT-29 cells, 54.2  $\mu$ M for the SW480 cells, and 66.9  $\mu$ M for the SW620 cells.
